# Supplementary material for: Effect of Haemophilus influenzae type b vaccination without a booster dose on invasive H influenzae type b disease, nasopharyngeal carriage, and population immunity in Kilifi, Kenya: a 15-year regional surveillance study
Source: PubMed Central journal article supplement (PMC4763163; doi:10.1016/s2214-109x(15)00316-2), 2016-02-05

# THE LANCET Global Health

## Supplementary appendix

This appendix formed part of the original submission and has been peer reviewed. We post it as supplied by the authors.

Supplement to: Hammitt LL, Crane RJ, Karani A, et al. Effect of *Haemophilus influenzae* type b vaccination without a booster dose on invasive *H influenzae* type b disease, nasopharyngeal carriage, and population immunity in Kilifi, Kenya: a 15-year regional surveillance study. *Lancet Glob Health* 2016; published online Feb 4. [http://dx.doi.org/10.1016/S2214-109X\(15\)00316-2](http://dx.doi.org/10.1016/S2214-109X(15)00316-2).

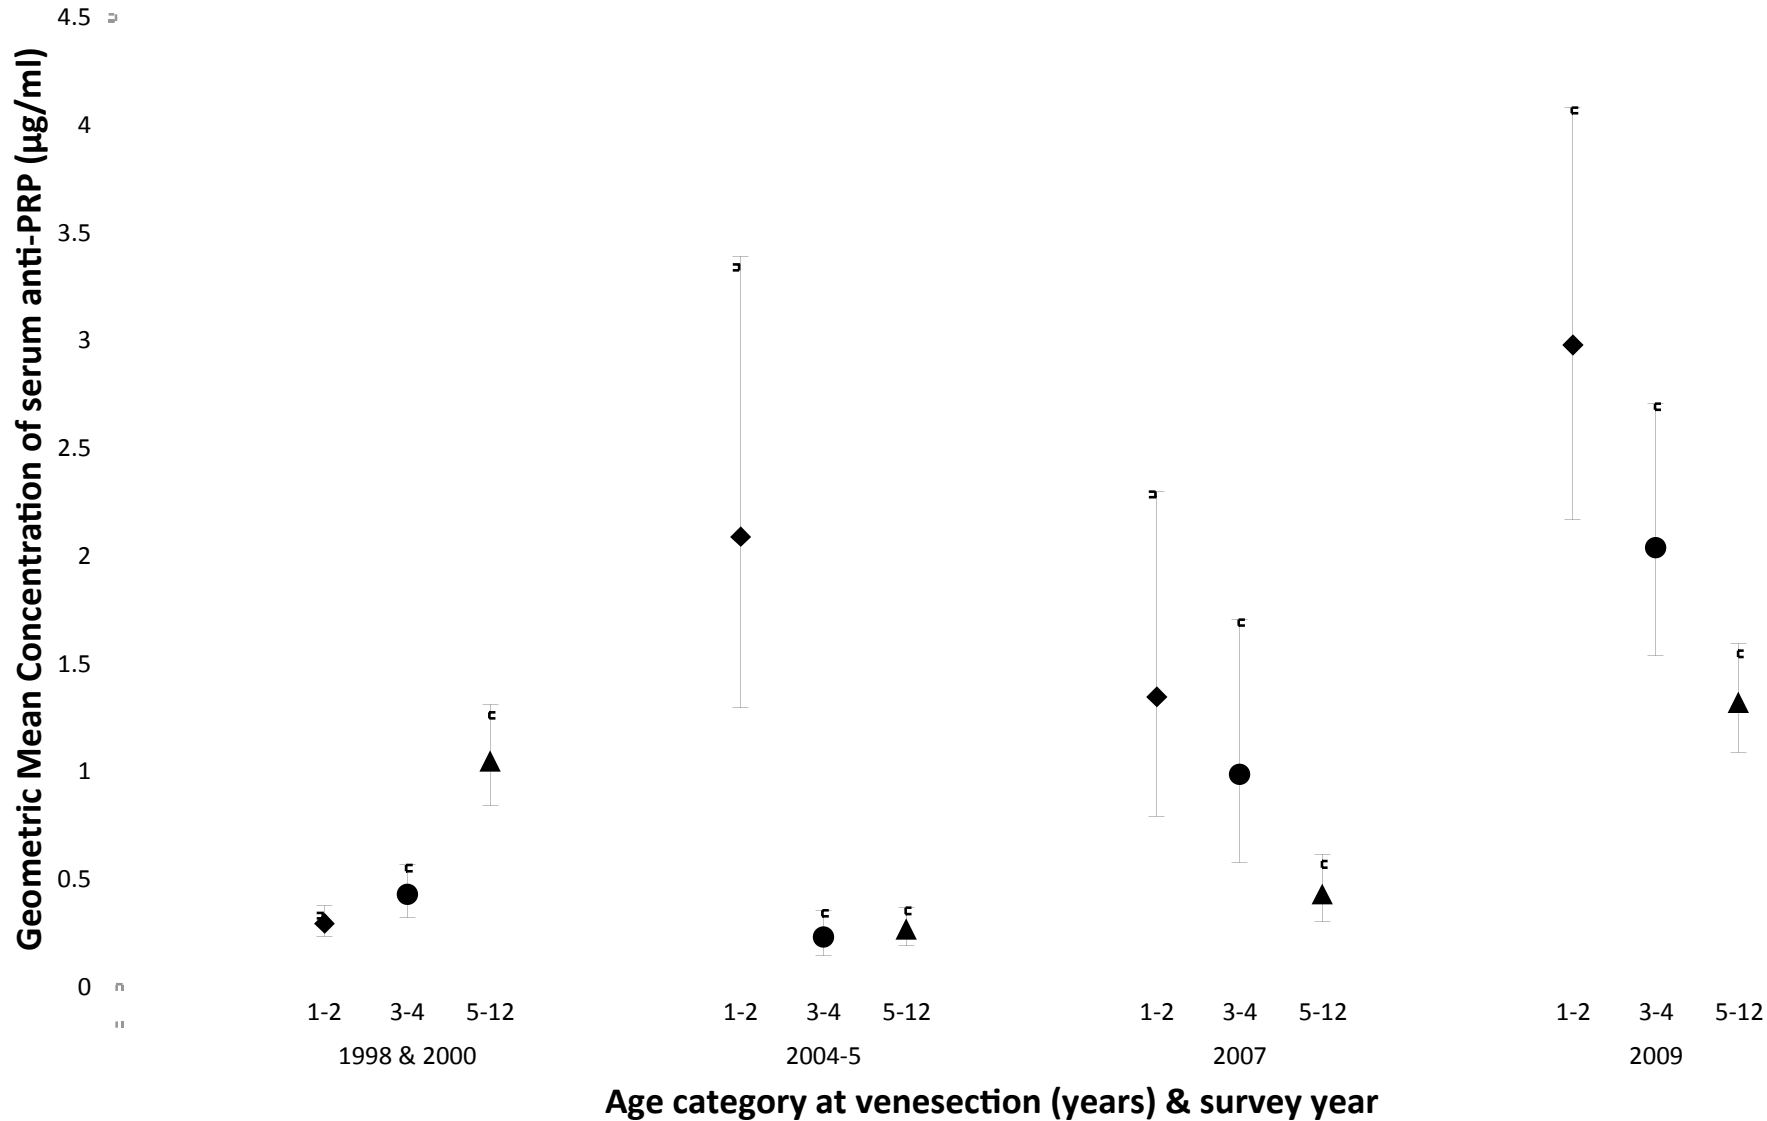

Supplement: mmc1.pdf [file mmc1.pdf]
